# Supplementary material for: Impact of South Asian Ethnicity on Long‐Term Outcomes After Coronary Artery Bypass Grafting Surgery: A Large Population‐Based Propensity Matched Study
Source: PubMed Central journal article supplement — J Am Heart Assoc. 2016 Jul 22;5(7):e003941. doi: 10.1161/JAHA.116.003941 (PMC5015415; doi:10.1161/jaha.116.003941), 2016-07-22
Supplement: JAH3-5-e003941-s001.pdf [file JAH3-5-e003941-s001.pdf]

# Supplemental Material

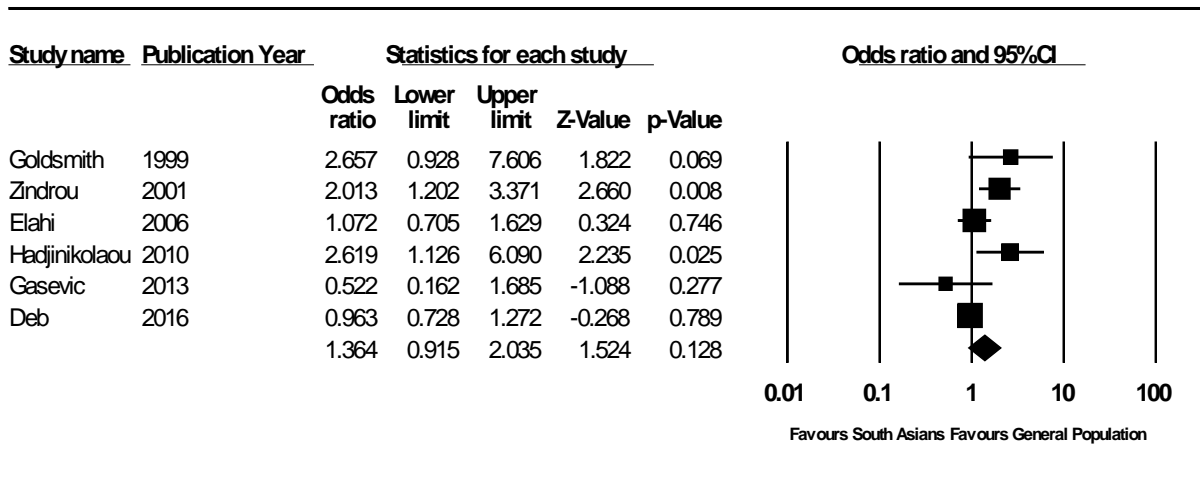

Figure S1: Meta-analysis of in-hospital or 30-day mortality of South Asians and the General Population after coronary artery bypass grafting surgery excluding study by Brister et al.<sup>1-6</sup>

## References

1. Goldsmith I, Lip GY, Tsang G and Patel RL. Comparison of primary coronary artery bypass surgery in a British Indo-Asian and white Caucasian population. *Eur Heart J.* 1999;20:1094-100.
2. Zindrou D, Bagger JP, Smith P, Taylor KM and Ratnatunga CP. Comparison of operative mortality after coronary artery bypass grafting in Indian subcontinent Asians versus Caucasians. *Am J Cardiol.* 2001;88:313-6.
3. Elahi M, Chetty G and Matata B. Ethnic differences in the management of coronary heart disease patients: lessons to be learned in indo-asians. *Medical principles and practice : international journal of the Kuwait University, Health Science Centre.* 2006;15:69-73.
4. Brister SJ, Hamdulay Z, Verma S, Maganti M and Buchanan MR. Ethnic diversity: South Asian ethnicity is associated with increased coronary artery bypass grafting mortality. *J Thorac Cardiovasc Surg.* 2007;133:150-4.
5. Hadjinikolaou L, Klimatsidas M, Maria Iacona G, Spyt T and Samani NJ. Short- and medium-term survival following coronary artery bypass surgery in British Indo-Asian and white Caucasian individuals: impact of diabetes mellitus. *Interact Cardiovasc Thorac Surg.* 2010;10:389-93.
6. Gasevic D, Khan NA, Qian H, Karim S, Simkus G, Quan H, Mackay MH, O'Neill BJ and Ayyobi AF. Outcomes following percutaneous coronary intervention and coronary artery bypass grafting surgery in Chinese, South Asian and White patients with acute myocardial infarction: administrative data analysis. *BMC Cardiovasc Disord.* 2013;13:121.
